# Supplementary material for: Sex hormones and meningiomas risk: a Mendelian randomization and immunohistochemical analysis
Source: Research Square preprint supplement (doi:10.21203/rs.3.rs-7564859/v1), 2025-10-08
Supplement: Supplementary file 1 [file 7f4176314303522d035ab21e.xlsx]

## Sheet: PRL
id.exposure	id.outcome	outcome	exposure	method	nsnp	b	se	pval	lo_ci	up_ci	or	or_lci95	or_uci95
UrETd6	8m9ptj	outcome	exposure	MR Egger	19	-0.279046	0.255701	0.290368	-0.780219	0.222128	0.756505	0.458306	1.24873
UrETd6	8m9ptj	outcome	exposure	Weighted median	19	0.40661	0.0674636	1.67e-09	0.274381	0.538838	1.50172	1.31572	1.71401
UrETd6	8m9ptj	outcome	exposure	Inverse variance weighted	19	0.365258	0.0514293	1.23e-12	0.264457	0.46606	1.44089	1.30272	1.5937
UrETd6	8m9ptj	outcome	exposure	Simple mode	19	0.406863	0.105068	0.00111607	0.200929	0.612796	1.5021	1.22254	1.84558
UrETd6	8m9ptj	outcome	exposure	Weighted mode	19	0.408877	0.112604	0.00191024	0.188174	0.629581	1.50513	1.20704	1.87682
> mr_heterogeneity(dat)
id.exposure id.outcome outcome exposure
1 UrETd6 8m9ptj outcome exposure
2 UrETd6 8m9ptj outcome exposure
method Q Q_df Q_pval
1 MR Egger 3.463051 17 0.9998079
2 Inverse variance weighted 10.079910 18 0.9292669
> mr_pleiotropy_test(dat)
id.exposure id.outcome outcome exposure
1 UrETd6 8m9ptj outcome exposure
egger_intercept se pval
1 0.1099514 0.04274395 0.01977889

## Sheet: IGF
id.exposure	id.outcome	outcome	exposure	method	nsnp	b	se	pval	lo_ci	up_ci	or	or_lci95	or_uci95
A115BB	WmDnQc	outcome	exposure	MR Egger	46	0.145829	0.165301	0.382461	-0.17816	0.469818	1.157	0.836808	1.5997
A115BB	WmDnQc	outcome	exposure	Weighted median	46	0.13509	0.0452753	0.00284746	0.0463503	0.22383	1.14464	1.04744	1.25086
A115BB	WmDnQc	outcome	exposure	Inverse variance weighted	46	0.12994	0.0348258	0.0001906	0.061682	0.198199	1.13876	1.06362	1.2192
A115BB	WmDnQc	outcome	exposure	Simple mode	46	0.135728	0.0899883	0.138472	-0.0406493	0.312105	1.14537	0.960166	1.3663
A115BB	WmDnQc	outcome	exposure	Weighted mode	46	0.136088	0.0853321	0.117758	-0.0311634	0.303339	1.14578	0.969317	1.35437
	> mr_heterogeneity(dat)
	id.exposure id.outcome outcome exposure
	1 A115BB WmDnQc outcome exposure
	2 A115BB WmDnQc outcome exposure
	method Q Q_df Q_pval
	1 MR Egger 0.4658684 44 1
	2 Inverse variance weighted 0.4755363 45 1
	> mr_pleiotropy_test(dat)
	id.exposure id.outcome outcome exposure egger_intercept
	1 A115BB WmDnQc outcome exposure -0.002384038
	se pval
	1 0.02424641 0.9221205

## Sheet: LH
id.exposure	id.outcome	outcome	exposure	method	nsnp	b	se	pval	lo_ci	up_ci	or	or_lci95	or_uci95
yYpfrW	7XpLxE	outcome	exposure	MR Egger	103	-0.020379	0.0341045	0.551481	-0.0872238	0.0464658	0.979827	0.916472	1.04756
yYpfrW	7XpLxE	outcome	exposure	Weighted median	103	0.0649737	0.0115271	1.73e-08	0.0423805	0.0875668	1.06713	1.04329	1.09152
yYpfrW	7XpLxE	outcome	exposure	Inverse variance weighted	103	0.0702048	0.00902144	7.14e-15	0.0525228	0.0878869	1.07273	1.05393	1.09186
yYpfrW	7XpLxE	outcome	exposure	Simple mode	103	0.065189	0.0213362	0.00286918	0.02337	0.107008	1.06736	1.02365	1.11294
yYpfrW	7XpLxE	outcome	exposure	Weighted mode	103	0.065189	0.0193898	0.0010902	0.0271851	0.103193	1.06736	1.02756	1.10871
	> mr_heterogeneity(dat)
	id.exposure id.outcome outcome exposure
	1 yYpfrW 7XpLxE outcome exposure
	2 yYpfrW 7XpLxE outcome exposure
	method Q Q_df Q_pval
	1 MR Egger 8.451288 101 1
	2 Inverse variance weighted 16.036757 102 1
	> mr_pleiotropy_test(dat)
	id.exposure id.outcome outcome exposure egger_intercept
	1 yYpfrW 7XpLxE outcome exposure 0.05605167
	se pval
	1 0.02035154 0.006979549

## Sheet: ER
id.exposure	id.outcome	outcome	exposure	method	nsnp	b	se	pval	lo_ci	up_ci	or	or_lci95	or_uci95
2ySy82	XSmvAg	outcome	exposure	MR Egger	83	0.0698826	0.0894853	0.437114	-0.105509	0.245274	1.07238	0.899867	1.27797
2ySy82	XSmvAg	outcome	exposure	Weighted median	83	-0.0474991	0.0520212	0.361205	-0.149461	0.0544626	0.953611	0.861172	1.05597
2ySy82	XSmvAg	outcome	exposure	Inverse variance weighted	83	-0.00258929	0.0372659	0.944606	-0.0756304	0.0704518	0.997414	0.927159	1.07299
2ySy82	XSmvAg	outcome	exposure	Simple mode	83	-0.0611512	0.120481	0.613124	-0.297293	0.174991	0.940681	0.742826	1.19124
2ySy82	XSmvAg	outcome	exposure	Weighted mode	83	-0.0828961	0.0975049	0.397704	-0.274006	0.108213	0.920447	0.760328	1.11429
> mr_heterogeneity(dat)
id.exposure id.outcome outcome exposure
1 2ySy82 XSmvAg outcome exposure
2 2ySy82 XSmvAg outcome exposure
method Q Q_df Q_pval
1 MR Egger 95.25383 81 0.1330920
2 Inverse variance weighted 96.18748 82 0.1354261
> mr_pleiotropy_test(dat)
id.exposure id.outcome outcome exposure egger_intercept
1 2ySy82 XSmvAg outcome exposure -0.01398082
se pval
1 0.01569063 0.375552

## Sheet: FSH
id.exposure	id.outcome	outcome	exposure	method	nsnp	b	se	pval	lo_ci	up_ci	or	or_lci95	or_uci95
JXKdeS	ZW10b2	outcome	exposure	MR Egger	22	0.0857685	0.121635	0.488862	-0.152636	0.324173	1.08955	0.858442	1.38289
JXKdeS	ZW10b2	outcome	exposure	Weighted median	22	0.0332224	0.086147	0.699757	-0.135626	0.202071	1.03378	0.873169	1.22393
JXKdeS	ZW10b2	outcome	exposure	Inverse variance weighted	22	-0.00731084	0.061134	0.90481	-0.127134	0.112512	0.992716	0.880616	1.11909
JXKdeS	ZW10b2	outcome	exposure	Simple mode	22	0.054197	0.149745	0.721021	-0.239303	0.347697	1.05569	0.787176	1.4158
JXKdeS	ZW10b2	outcome	exposure	Weighted mode	22	0.0616707	0.128102	0.635197	-0.189409	0.31275	1.06361	0.827448	1.36718
> mr_heterogeneity(dat)
id.exposure id.outcome outcome exposure
1 JXKdeS ZW10b2 outcome exposure
2 JXKdeS ZW10b2 outcome exposure
method Q Q_df Q_pval
1 MR Egger 16.71499 20 0.6713951
2 Inverse variance weighted 17.49850 21 0.6804818
>
> mr_pleiotropy_test(dat)
id.exposure id.outcome outcome exposure egger_intercept
1 JXKdeS ZW10b2 outcome exposure -0.02181433
se pval
1 0.02464461 0.386591

## Sheet: HCG
id.exposure	id.outcome	outcome	exposure	method	nsnp	b	se	pval	lo_ci	up_ci	or	or_lci95	or_uci95
eF0qIY	TjaqOQ	outcome	exposure	MR Egger	16	-0.0605027	0.0327094	0.085577	-0.124613	0.00360779	0.941291	0.882838	1.00361
eF0qIY	TjaqOQ	outcome	exposure	Weighted median	16	-0.0396247	0.0248809	0.111255	-0.0883912	0.0091418	0.96115	0.915403	1.00918
eF0qIY	TjaqOQ	outcome	exposure	Inverse variance weighted	16	-0.0403122	0.019957	0.0433886	-0.0794279	-0.00119642	0.96049	0.923645	0.998804
eF0qIY	TjaqOQ	outcome	exposure	Simple mode	16	-0.0360607	0.0315822	0.271435	-0.0979617	0.0258403	0.964582	0.906684	1.02618
eF0qIY	TjaqOQ	outcome	exposure	Weighted mode	16	-0.0401869	0.0250079	0.128902	-0.0892024	0.00882851	0.96061	0.91466	1.00887
> mr_heterogeneity(dat)
id.exposure id.outcome outcome exposure
1 eF0qIY TjaqOQ outcome exposure
2 eF0qIY TjaqOQ outcome exposure
method Q Q_df Q_pval
1 MR Egger 4.586258 14 0.9907789
2 Inverse variance weighted 5.193230 15 0.9903601
> mr_pleiotropy_test(dat)
id.exposure id.outcome outcome exposure egger_intercept
1 eF0qIY TjaqOQ outcome exposure 0.01608814
se pval
1 0.02065008 0.4489

## Sheet: GHR
id.exposure	id.outcome	outcome	exposure	method	nsnp	b	se	pval	lo_ci	up_ci	or	or_lci95	or_uci95
zyurHZ	qZrKCA	outcome	exposure	MR Egger	25	0.134862	0.179413	0.459864	-0.216787	0.486511	1.14438	0.805102	1.62663
zyurHZ	qZrKCA	outcome	exposure	Weighted median	25	-0.0537546	0.0760987	0.479953	-0.202908	0.095399	0.947665	0.816353	1.1001
zyurHZ	qZrKCA	outcome	exposure	Inverse variance weighted	25	-0.0719275	0.0635502	0.257709	-0.196486	0.0526309	0.930598	0.821613	1.05404
zyurHZ	qZrKCA	outcome	exposure	Simple mode	25	-0.00212734	0.160399	0.989528	-0.31651	0.312255	0.997875	0.728688	1.3665
zyurHZ	qZrKCA	outcome	exposure	Weighted mode	25	-0.101171	0.157497	0.526722	-0.409865	0.207523	0.903778	0.66374	1.23063
	> mr_heterogeneity(dat)
	id.exposure id.outcome outcome exposure
	1 zyurHZ qZrKCA outcome exposure
	2 zyurHZ qZrKCA outcome exposure
	method Q Q_df Q_pval
	1 MR Egger 37.99731 23 0.02548877
	2 Inverse variance weighted 40.49934 24 0.01889014
	> mr_pleiotropy_test(dat)
	id.exposure id.outcome outcome exposure egger_intercept
	1 zyurHZ qZrKCA outcome exposure -0.0440314
	se pval
	1 0.035779 0.230892

## Sheet: Thyroxine 
id.exposure	id.outcome	outcome	exposure	method	nsnp	b	se	pval	lo_ci	up_ci	or	or_lci95	or_uci95
67yiP3	meKXC4	outcome	exposure	MR Egger	68	0.264997	0.256507	0.305329	-0.237757	0.767751	1.30343	0.788394	2.15491
67yiP3	meKXC4	outcome	exposure	Weighted median	68	0.131202	0.178594	0.462558	-0.218842	0.481246	1.1402	0.803449	1.61809
67yiP3	meKXC4	outcome	exposure	Inverse variance weighted	68	0.163006	0.127718	0.20185	-0.0873208	0.413333	1.17704	0.916383	1.51185
67yiP3	meKXC4	outcome	exposure	Simple mode	68	0.286957	0.346003	0.409853	-0.391209	0.965123	1.33237	0.676239	2.62511
67yiP3	meKXC4	outcome	exposure	Weighted mode	68	0.196649	0.260953	0.453743	-0.31482	0.708118	1.21732	0.72992	2.03017
> mr_heterogeneity(dat)
id.exposure id.outcome outcome exposure
1 67yiP3 meKXC4 outcome exposure
2 67yiP3 meKXC4 outcome exposure
method Q Q_df Q_pval
1 MR Egger 84.95964 66 0.05807636
2 Inverse variance weighted 85.23130 67 0.06582399
> mr_pleiotropy_test(dat)
id.exposure id.outcome outcome exposure egger_intercept
1 67yiP3 meKXC4 outcome exposure -0.006789703
se pval
1 0.01477972 0.6474614

## Sheet: TSH
id.exposure	id.outcome	outcome	exposure	method	nsnp	b	se	pval	lo_ci	up_ci	or	or_lci95	or_uci95
TE2Tfo	5450CE	outcome	exposure	MR Egger	13	-0.0499949	0.329799	0.882253	-0.696401	0.596411	0.951234	0.498376	1.81559
TE2Tfo	5450CE	outcome	exposure	Weighted median	13	0.0299369	0.112554	0.790257	-0.190669	0.250543	1.03039	0.826406	1.28472
TE2Tfo	5450CE	outcome	exposure	Inverse variance weighted	13	0.00640944	0.0905297	0.943557	-0.171029	0.183848	1.00643	0.842797	1.20183
TE2Tfo	5450CE	outcome	exposure	Simple mode	13	-0.0168151	0.183394	0.928458	-0.376266	0.342636	0.983326	0.686419	1.40866
TE2Tfo	5450CE	outcome	exposure	Weighted mode	13	-0.0308125	0.168486	0.857947	-0.361045	0.29942	0.969657	0.696947	1.34908
> mr_heterogeneity(dat)
id.exposure id.outcome outcome exposure
1 TE2Tfo 5450CE outcome exposure
2 TE2Tfo 5450CE outcome exposure
method Q Q_df Q_pval
1 MR Egger 14.94916 11 0.1848365
2 Inverse variance weighted 14.99246 12 0.2418493
> mr_pleiotropy_test(dat)
id.exposure id.outcome outcome exposure egger_intercept
1 TE2Tfo 5450CE outcome exposure 0.009690953
se pval
1 0.05429172 0.861577

## Sheet: PR
id.exposure	id.outcome	outcome	exposure	method	nsnp	b	se	pval	lo_ci	up_ci	or	or_lci95	or_uci95
Pv3jrO	epHmgu	outcome	exposure	MR Egger	22	-0.472613	0.204507	0.0316184	-0.873446	-0.0717794	0.623371	0.41751	0.930736
Pv3jrO	epHmgu	outcome	exposure	Weighted median	22	0.0205633	0.143414	0.885987	-0.260529	0.301655	1.02078	0.770644	1.3521
Pv3jrO	epHmgu	outcome	exposure	Inverse variance weighted	22	0.00704428	0.116716	0.951874	-0.221719	0.235807	1.00707	0.801141	1.26593
Pv3jrO	epHmgu	outcome	exposure	Simple mode	22	-0.242342	0.273494	0.3856	-0.778391	0.293706	0.784787	0.459144	1.34139
Pv3jrO	epHmgu	outcome	exposure	Weighted mode	22	0.0305789	0.204092	0.882329	-0.369442	0.4306	1.03105	0.69112	1.53818
> mr_heterogeneity(dat)
id.exposure id.outcome outcome exposure
1 Pv3jrO epHmgu outcome exposure
2 Pv3jrO epHmgu outcome exposure
method Q Q_df Q_pval
1 MR Egger 20.09908 20 0.4517472
2 Inverse variance weighted 27.47228 21 0.1557621
> mr_pleiotropy_test(dat)
id.exposure id.outcome outcome exposure egger_intercept
1 Pv3jrO epHmgu outcome exposure 0.0894374
se pval
1 0.03301902 0.01351914

[truncated: 1 more sheets: databases]
